# Supplementary material for: Surfactant free gram scale synthesis of mesoporous Ni(OH)2–r-GO nanocomposite for high rate pseudocapacitor application
Source: Royal Society of Chemistry journal article supplement (doi:10.1039/c4ra06601d), 2014-08-19
Supplement: c4ra06601d1.pdf [file c4ra06601d1.pdf]

## Surfactant free gram scale synthesis of mesoporous $\text{Ni}(\text{OH})_2$ -r-GO nanocomposite for high rate pseudocapacitor application

Upendra Singh, Abhik Banerjee\*, Dattakumar Mhamane, Anil Suryawanshi, Kush Kumar Upadhyay and Satishchandra Ogale\*

### Electronic Supplementary Information (ESI)

ESI-I: SEM image, elemental map, and energy dispersive x-ray analysis (EDAX) data for (a-c)  $\text{Ni}(\text{OH})_2$ -r-GO and (d-f)  $\text{Ni}(\text{OH})_2$ .

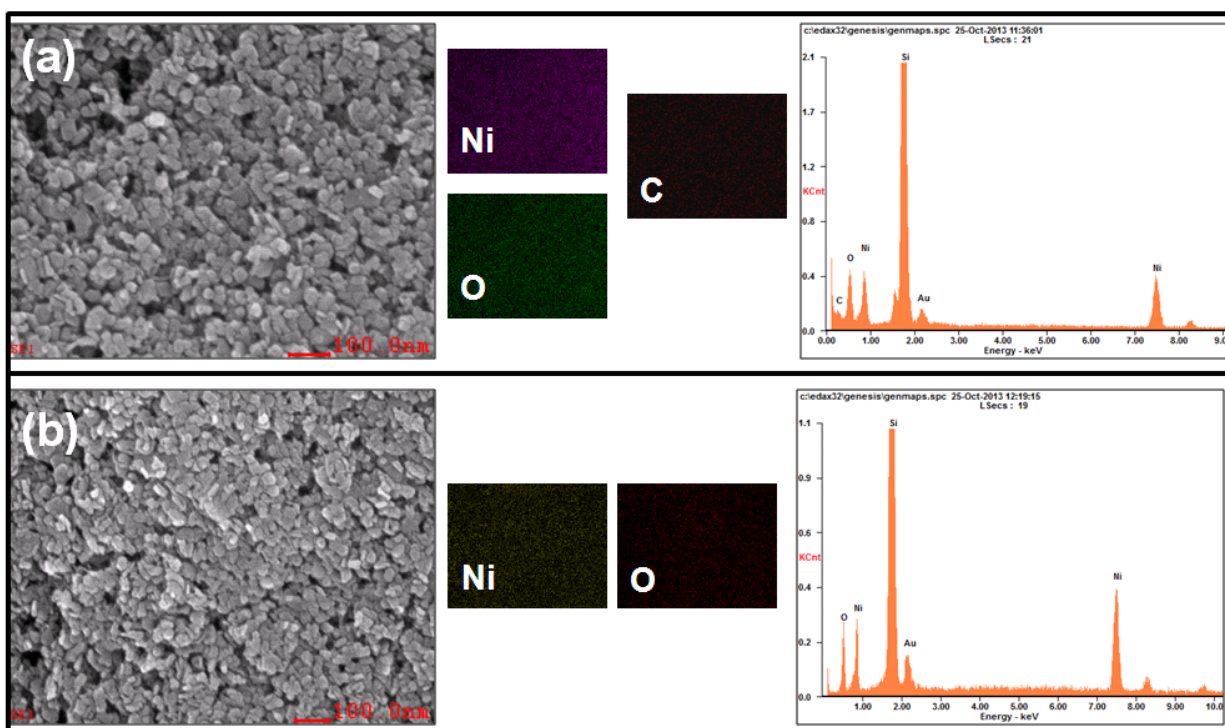

Figure above shows the Scanning Electron Microscopy (SEM) and energy dispersive x-ray analysis (EDAX) analysis for  $\text{Ni}(\text{OH})_2$ -r-GO (a) and  $\text{Ni}(\text{OH})_2$  (b). The presence of different faceted structures for  $\text{Ni}(\text{OH})_2$  in both the samples can be easily observed (please see Figure a and b). The morphology is mainly dominated by hexagonal plates. In the case of  $\text{Ni}(\text{OH})_2$ -r-GO as well the basic morphology is similar. In order to confirm the presence of graphene we drop casted the composite solution on conducting silicon substrate to perform the elemental mapping analysis. The map shown in the Figure b shows the overlay of nickel (Ni), oxygen (O) and carbon (C). The inset of Figure b shows the elemental maps of individual element present in the sample, confirming their uniform distribution in the  $\text{Ni}(\text{OH})_2$ -r-GO composite. Energy dispersive analysis of x-rays (EDAX) spectrum for  $\text{Ni}(\text{OH})_2$ -r-GO is depicted in Figure c. Figure (d-f) show the FE-SEM image, elemental mapping, and EDAX spectrum for the bare  $\text{Ni}(\text{OH})_2$  sample for comparison. No carbon contribution is seen as expected.

**ESI-II: Table 1. Comparison of results with recent reports**

| Electrode Structure                                  | Synthesis Method    | Electrolyte   | Specific capacitance at low current density/scan rate | Specific capacitance at high current density/ scan rate |
|------------------------------------------------------|---------------------|---------------|-------------------------------------------------------|---------------------------------------------------------|
| <b>Ni(OH)<sub>2</sub>- r-GO (Present work)</b>       | <b>Hydrothermal</b> | <b>2M KOH</b> | <b>1795 Fg<sup>-1</sup>@ 1Ag<sup>-1</sup></b>         | <b>1538 Fg<sup>-1</sup>@ 40 Ag<sup>-1</sup></b>         |
| Ni(OH) <sub>2</sub> /Carbon Paper)<br>(Present work) | Hydrothermal        | 2M KOH        | 1707 Fg <sup>-1</sup> @ 1Ag <sup>-1</sup>             | 936 Fg <sup>-1</sup> @ 40 Ag <sup>-1</sup>              |
| Ni(OH) <sub>2</sub> /UGF <sup>45</sup>               | CVD                 | 6M KOH        | 1560 Fg <sup>-1</sup> @ 0.5 Ag <sup>-1</sup>          | 1092 Fg <sup>-1</sup> @ 10 Ag <sup>-1</sup>             |
| Ni(OH) <sub>2</sub> /r-GO/NF <sup>46</sup>           | Reflux reaction     | 1M KOH        | 1828 Fg <sup>-1</sup> @ 1 Ag <sup>-1</sup>            | 780 Fg <sup>-1</sup> @ 10 Ag <sup>-1</sup>              |
| Ni(OH) <sub>2</sub> /Graphene/NF <sup>32</sup>       | Co-precipitation    | 6M KOH        | 2194 Fg <sup>-1</sup> @ 2 mVs <sup>-1</sup>           | 895 Fg <sup>-1</sup> @ 20 mVs <sup>-1</sup>             |
| Ni(OH) <sub>2</sub> /Graphene/NF <sup>47</sup>       | Hydrothermal        | 6M KOH        | 1985.1Fg <sup>-1</sup> @5 Acm <sup>-2</sup>           | 912.6Fg <sup>-1</sup> @ 40 mAcm <sup>-2</sup>           |
| Ni(OH) <sub>2</sub> /Graphite/NF <sup>48</sup>       | Reflux reaction     | 6M KOH        | 1956 Fg <sup>-1</sup> @ 1Ag <sup>-1</sup>             | 1519.9 Fg <sup>-1</sup> @ 40 Ag <sup>-1</sup>           |
| Ni(OH) <sub>2</sub> /Graphene/NF <sup>49</sup>       | Precipitation       | 6M KOH        | 2134 Fg <sup>-1</sup> @ 2 mVs <sup>-1</sup>           | 822.2 Fg <sup>-1</sup> @ 70 mVs <sup>-1</sup>           |
| Ni(OH) <sub>2</sub> /Graphite <sup>50</sup>          | Electrodeposition   | 5.3M KOH      | 1850 Fg <sup>-1</sup> @ 3.2 Ag <sup>-1</sup>          | 550 Fg <sup>-1</sup> @ 11.9 Ag <sup>-1</sup>            |
| RGO/Ni(OH) <sub>2</sub> /NF <sup>51</sup>            | Hydrothermal        | 1M KOH        | 1667 Fg <sup>-1</sup> @ 3.3 Ag <sup>-1</sup>          | 444.75 Fg <sup>-1</sup> @ 33 Ag <sup>-1</sup>           |
| RGO/CNT/Ni(OH) <sub>2</sub> / NF <sup>52</sup>       | Hydrothermal        | 2M KOH        | 1320 Fg <sup>-1</sup> @ 6 Ag <sup>-1</sup>            | 943 Fg <sup>-1</sup> @ 25 Ag <sup>-1</sup>              |
| Ni(OH) <sub>2</sub> /Graphite <sup>2</sup>           | Electrodeposition   | 1M KOH        | 1868 Fg <sup>-1</sup> @ 20 Ag <sup>-1</sup>           | 1430 Fg <sup>-1</sup> @ 40 Ag <sup>-1</sup>             |
